# Supplementary material for: Persistence in studies in relation to learning approaches and first-year grades: a study of university chemistry students in Finland
Source: Royal Society of Chemistry journal article supplement (doi:10.1039/c8rp00244d), 2019-01-01
Supplement: c8rp00244d1.pdf [file c8rp00244d1.pdf]

There is no ESI associated with this article.
